# Supplementary material for: Invisible photonic prints shown by UV illumination: combining photoluminescent and noniridescent structural colors
Source: Royal Society of Chemistry journal article supplement (doi:10.1039/c9tc03982a), 2019-01-01
Supplement: c9tc03982a1.pdf [file c9tc03982a1.pdf]

## Supporting Information

### Invisible Photonic Prints Shown by UV Illumination: Combining the Photoluminescent and Noniridescent Structural Colors

Dongpeng Yang,<sup>\*,†,‡</sup> Guolong Liao,<sup>§,‡</sup> and Shaoming Huang<sup>\*,†</sup>

<sup>†</sup>School of Materials and Energy, Guangdong University of Technology, Guangzhou 510006, P. R.

China.

<sup>§</sup>Zhejiang Key Laboratory of Carbon Materials, Wenzhou University, Wenzhou 325027, P. R. China.

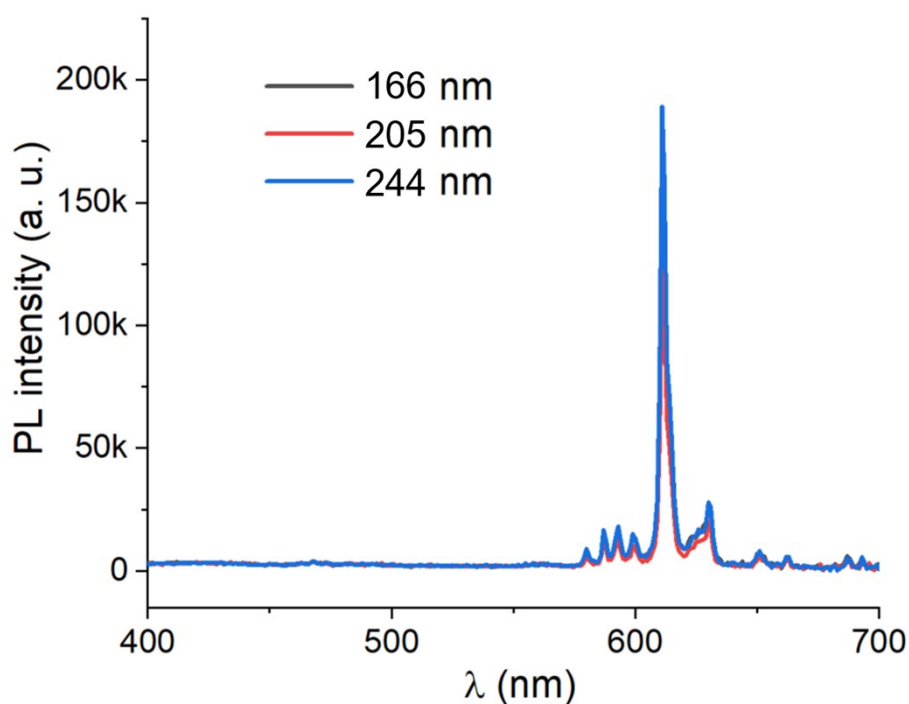

Figure S1 PL intensity of the Y<sub>2</sub>O<sub>3</sub>: Eu particles with different size, (a) 166 nm, (b) 205 nm, and (c) 244 nm.

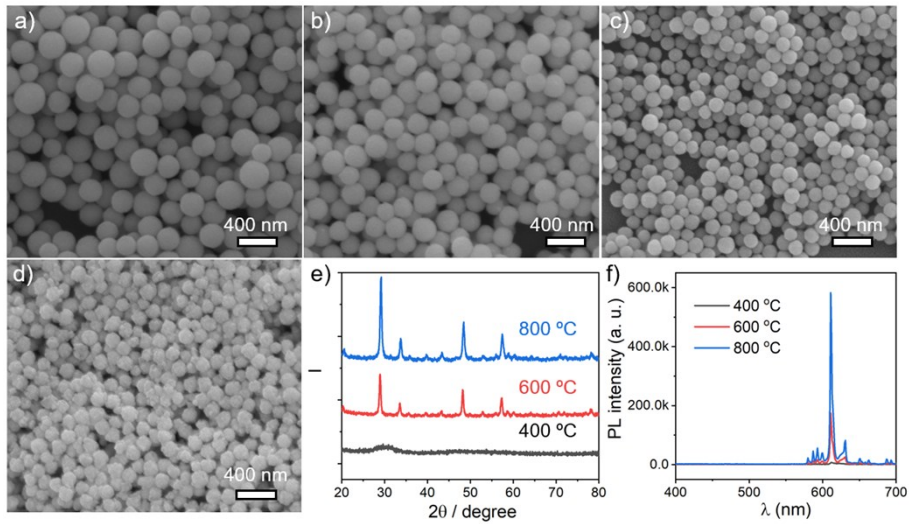

Figure S2. SEM images of  $\text{Y}_2\text{O}_3:\text{Eu}$  particles calcined at (a) 400 °C, (b) 600 °C, (c) 800 °C, (d) 1000 °C, and the corresponding XRD pattern (e) and photoluminescence spectra (f).

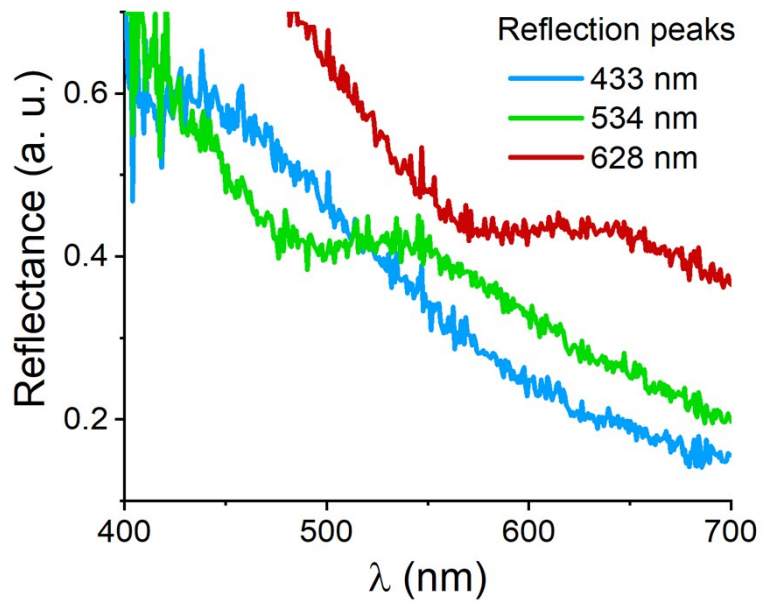

Figure S3. Reflectance of the APCs films assembled from  $\text{Y}_2\text{O}_3:\text{Eu}$  particles of different sizes, (a) 166 nm, (b) 205 nm, (c) 244 nm.

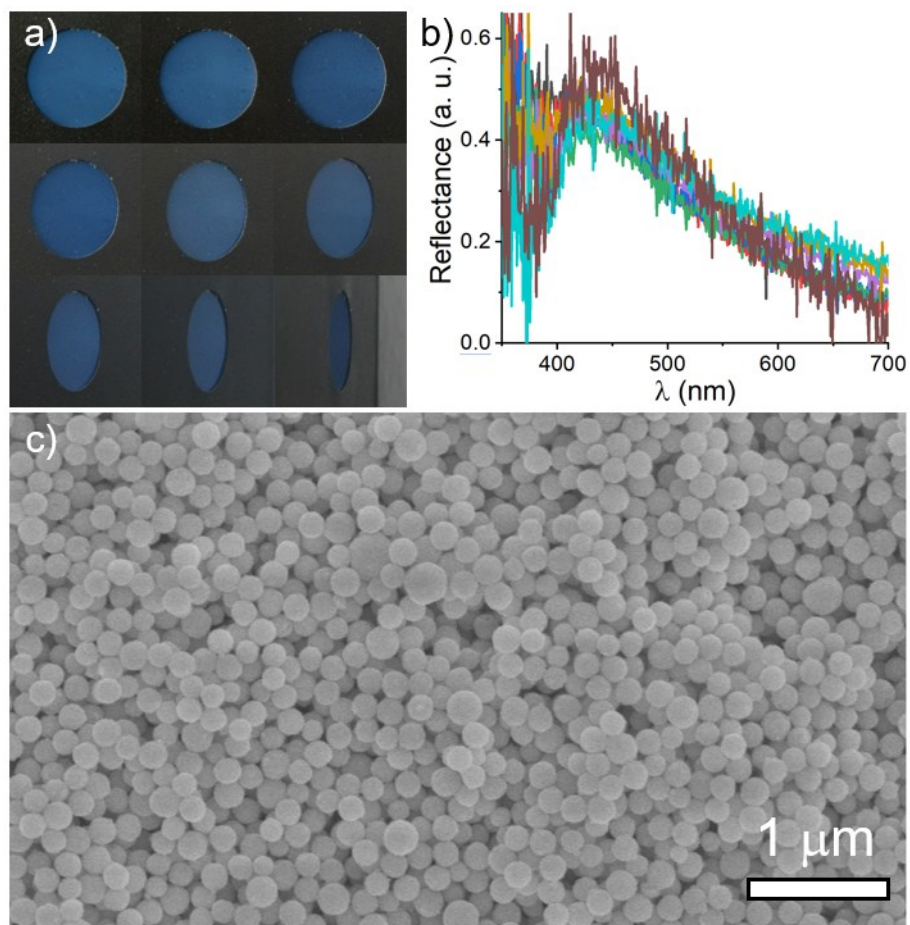

Figure S4. (a) Digital photos, (b) reflection spectra, and (c) SEM image of the APC film assembled from the  $\text{Y}_2\text{O}_3$  particles of 150 nm. The diameter of the circle in (a) is 1 cm.
